# Supplementary material for: No evidence of canopy-scale leaf thermoregulation to cool leaves below air temperature across a range of forest ecosystems
Source: PubMed Central journal article supplement — Proc Natl Acad Sci U S A. 2022 Sep 12;119(38):e2205682119. doi: 10.1073/pnas.2205682119 (PMC9499539; doi:10.1073/pnas.2205682119), 2022-09-12
Supplement: pnas.2205682119.sapp.pdf [file pnas.2205682119.sapp.pdf]

1  
2  
3  
4  
5  
6  
7  
8  
9  
10  
11  
12  
13  
14  
15  
16  
17  
18  
19  
20  
21  
22  
23  
24  
25  
26  
27  
28  
29  
30  
31  
32  
33  
34

**Supplementary Information for**

*No evidence of canopy-scale leaf thermoregulation to cool leaves below air temperature across a range of forest ecosystems*

**Authors:** Still\*, C.J., Page, G.F.M., Griffith, D.M., Rastogi., B., Aubrecht, D.M., Kim, Y., Burns, S.P., Hanson, C.V., Kwon, H., Hawkins, L., Meinzer, F.C., Sevanto, S., Roberts, D.A., Goulden, M., Pau, S., Detto, M., Helliker, B.R., and Richardson, A.D.

Christopher Still  
**Email:** [chris.still@oregonstate.edu](mailto:chris.still@oregonstate.edu)

**This PDF file includes:**

- Supplementary text
- Figures S1 to S9
- Tables S1 to S1
- SI References

## Supplementary Information Text

### Site thermal data acquisition and analysis

$T_{leaf}$  observations were collected using thermal cameras from multiple forest research sites in North and Central America (Tables S1, S2) to assess how and when leaf homeothermy can occur. Using thermal cameras assumes a certain object emissivity and corrections for reflected downwelling thermal infrared radiation. Important variables were included in the correction procedure outlined by (1, 2) to account for environmental influences on temperatures measured by our cameras. We assumed a canopy-scale leaf emissivity of 0.98. In almost all cases the corrections were small ( $< 1K$ ), with the largest changes for morning periods following cold nights (at Metolius, Wind River, Pinyon Flat, and Niwot Ridge). At each site, regions of interest (ROIs) containing leaves were selected from imagery and the values across ROIs were averaged to calculate  $T_{leaf}$  at the level of the entire canopy ( $T_{can}$ ), at the species level (HF), or at the level of leaf habit (BCI), and only when trees were leafed out. Cameras were pointed north (facing sunlit canopies) at all sites except for the tropical one (BCI) with high solar angles. This camera faced southwest toward the canopy around the eddy flux system. Other site imaging details are discussed elsewhere (1, 3–6).

#### **Metolius**

A thermal camera (FLIR A325sc, FLIR System Inc., Wilsonville, OR, USA) on a fixed-mount was used to capture TIR images. The camera was housed inside a FLIR standard enclosure to protect the camera from rain and frost. The camera and housing were upright and positioned to face north-northwest to avoid direct sunlight. The pixel resolution of this camera model is  $360 \times 240$  pixels; a FLIR IR 30-mm lens (focal length: 30.38 mm; field of view:  $15^\circ \times 11.25^\circ$ ) was used for image collection. Within the field of view (FOV), spot sizes of a single pixel are 0.83 cm from 10-m distance and 8.3 cm from 100-m distance. This camera uses an uncooled microbolometer detector to scan the longwave spectra ranging from 7.5 to 13.0  $\mu\text{m}$ . The maximum frame rate for recording is 60 Hz, and the external air temperature operating range is  $-20$  to  $120$   $^\circ\text{C}$ . A fanless computer (PC) was used to control the camera and collect images using the Gigabit Ethernet data streaming protocol for connection between the camera and PC. FLIR ResearchIR 3.4 SP2 software was used to control the camera and collect images. The measurement interval was fixed at 5 minutes throughout the 2015 growing season, creating 288 images per day during when the system was continuously operational. ROIs were selected as described in (3). Sub-hourly data were further averaged to the hour. Data was filtered from day of year 115 to 260 in 2015.

#### **Wind River**

The same type of thermal camera system deployed at Metolius was used to capture TIR images from Wind River. However, the camera was mounted on a pan-tilt system (FLIR PTU-D100E, FLIR System Inc., Wilsonville, OR) to image a large area of the forest, and in particular to measure multiple canopy heights to capture vertical changes in canopy thermal states. PTU movements were controlled via a terminal emulator program running in a PC located inside an instrument shed at the base of the flux tower. Approximately 60-m length ethernet and telephone cables were used to connect between the PC in the shed and the thermal camera and PTU on the tower. We selected ten PTU angle positions for the canopy measurement across the vertical profile from the bottom to top canopy layers. Five PTU positions were focused on the upper canopy,  $\sim 40$  to  $60$  m in height, and the remaining five PTU positions imaged the mid-level canopy ( $\sim 20$  to  $50$  m at height) and lower-level canopy layers ( $\sim 0$  to  $30$  m at height). The measurement interval for each PTU position was 6 minutes (one complete cycle over 60 minutes) during the 2015 growing season. For this study, ROIs from the upper, sunlit canopy PTU positions were averaged together. Sub-hourly data were averaged to the hour. Data was filtered from day of year 70 to 258 in 2015.

#### **Niwot Ridge**

An instrument package similar to the one at Harvard Forest was deployed in 2015 at the 26 m tall Ameriflux tower at the Mountain Research Station operated by the University of Colorado. This package includes an A655sc camera (FLIR Systems, Inc.,  $640 \times 480$  pixel resolution,  $45^\circ$  FOV), mounted near the top of the tower and pointed east with an inclination  $\sim 30^\circ$  below the horizon. Supporting measurements were made using instrumentation similar to the Harvard Forest site. Image acquisition was performed by FLIR's ResearchIR software running on a fanless industrial computer mounted on the tower. For more details see (1). Data was filtered from day of year 100 to 310 (collection spanning years 2015 to 2019).

#### **Pinyon Flat**

91 A thermal camera (FLIR A325sc, FLIR System Inc.) mounted on a pan-tilt system (FLIR PTU-D100E,  
92 FLIR System Inc.) was installed on the flux tower to capture TIR images. Further information about image  
93 collection and processing can be found at: [https://faculty.sites.uci.edu/mgoulden/development-of-tower-](https://faculty.sites.uci.edu/mgoulden/development-of-tower-based-tools-for-quantifying-vegetation-distribution-and-health/)  
94 [based-tools-for-quantifying-vegetation-distribution-and-health/](https://faculty.sites.uci.edu/mgoulden/development-of-tower-based-tools-for-quantifying-vegetation-distribution-and-health/). Data was filtered from day of year 135 to  
95 288 (collection spanning years 2013 to 2015).

#### 96 **Harvard Forest**

97 The thermal camera (model A655sc from FLIR Systems, Inc., 640 × 480 pixel resolution, 45°FOV) was  
98 mounted on the 40 m tall “Barn Tower” (42.5353° N 72.1899° W, elev. 350 m ASL), The camera was  
99 installed in 2013. Images were acquired continuously every 15 min by FLIR’s ExamInIR software running  
100 on fanless industrial computers (Neosys POC-100, Logic Supply, Inc.) at the base of the tower and  
101 connected to the camera via Ethernet. Within the thermal images, we extracted temperature information  
102 for upper-canopy (i.e., potentially exposed to full sunlight for some or all of the day) foliage from the  
103 dominant tree species. Full details of the setup and image processing are given by (1). Data was filtered  
104 from day of year 135 to 288 in 2015.

#### 105 **Barro Colorado Island**

106 At this site a FLIR A325sc thermal camera (FLIR System Inc.) was installed on a telecommunications  
107 tower 40 m above ground (10 m above mean canopy height) and connected with a 50 m Ethernet cable  
108 to a laptop located in a shed under the tower. The camera was facing southwest to capture high-  
109 frequency TIR images in the footprint of an eddy covariance tower located about 150 m from the  
110 telecommunication tower. Images were collected every 5 minutes from February 17 to September 30,  
111 2015, for a total of 288 images per day. Continuous measurements were interrupted between August 3-6,  
112 2015. In total, 5198 images were captured across 257 days. Within the FOV, a single pixel spot size is  
113 0.14 cm from 1 m, 1.4 cm from 10 m, 6.9 cm from 50 m, and 20.8 cm from 150 m in a single pixel. Each  
114 ROI was 2 by 2 pixels and effective pixel sizes ranged between ~7 and 20 cm depending on distance.  
115 Full details of the setup and image processing are given by (5). Data period filtered from day of year 48 to  
116 252 in 2015.

117

#### 118 **Tower flux, meteorological, and radiation data**

##### 119 **Metolius (AMERIFLUX site US-Me-2)**

120 Eddy-covariance (EC) measurements at MR were conducted using a 3-D sonic anemometer (model  
121 CSAT3, Campbell Scientific Inc., Logan, UT, USA) and a closed-path infrared gas analyzer (model LI-  
122 7200, LI-COR Inc., Lincoln, NE, USA) at a height of 33.0 m. CO<sub>2</sub> storage is measured using a profile  
123 system (7 heights, model LI-820, LI-COR Inc.) Processing of high frequency data follow Kwon et al.  
124 (2018) and Thomas et al. (2009). GPP was calculated as the residual of NEE and Re. Partitioned data  
125 were gap filled using the online tool REddyProc. Thirty-minute fluxes are calculated using outlier removal  
126 of turbulent variables in raw data and rigorous quality control of initial 30-min flux data using a  
127 combination of higher-order statistics and quality flags for stationarity. After removing unsatisfactory  
128 flagged data, gap-filling was conducted separately for CO<sub>2</sub> and H<sub>2</sub>O fluxes. Meteorological measurements  
129 include a 4-component radiometer (model CNR1, Kipp & Zonen, Delft, The Netherlands) and air  
130 temperature and relative humidity (model HMP45, Vaisala, Helsinki, Finland) at 31.6 m. More details on  
131 flux data processing and instrument can be found in (7, 8). All flux data were from the 2015 growing  
132 season and corresponded to the same DOY filters as the thermal data.

##### 133 **Wind River (AMERIFLUX site US-Wrc)**

134 Carbon, water, and energy fluxes have been collected since 1998 using the EC technique at the Wind  
135 River tower. The most recent EC system consists of a 3-D sonic anemometer (CSAT3, Campbell  
136 Scientific Inc.) and a closed-path infrared gas analyzer (LI-7000, Li-COR Inc.). The EC system is located  
137 approximately 10 m above the canopy top at a height of 70 m. NEE was partitioned into ecosystem  
138 respiration (Re) and GPP by identifying a turbulence (friction velocity) threshold, fitting an exponential  
139 temperature response curve to the nighttime NEE, and extrapolating the relationship to calculate daytime  
140 Re. GPP was calculated as the residual of NEE and Re. Partitioned data were gap filled using the online  
141 tool REddyProc. Measurements of radiation and temperature and relative humidity were conducted using  
142 a 4-component radiometer (CNR1, Kipp & Zonen) and a temperature/humidity sensor (HMP45-C,  
143 Vaisala) at 70.0 m. For flux data processing and instrument details see (9). All flux data were from the  
144 2015 growing season and corresponded to the same DOY filters as the thermal data.

##### 145 **Niwot Ridge (AMERIFLUX site US-NR1)**

146 Fluxes of CO<sub>2</sub>, H<sub>2</sub>O, and sensible heat were measured at 21.5 m on the main tower using a 3-D sonic  
 147 anemometer (CSAT3, Campbell Scientific Inc.), krypton hygrometer (model KH2O, Campbell Scientific  
 148 Inc.), and closed-path infrared gas analyzers (model LI-6262 and LI-7200, LI-COR Inc.). Flux data were  
 149 processed using standard EC flux data-processing techniques. Prior to the flux calculations, the  
 150 measured wind components were transformed into streamline coordinates using the planar-fit method.  
 151 For sensible heat flux, corrections to the sonic temperature following (10) were applied. To calculate CO<sub>2</sub>  
 152 storage, a vertical profile of CO<sub>2</sub> was measured at the tower between years 1999-2016 (11) and has been  
 153 modeled since 2016. GPP was calculated as the residual of NEE and Re. Partitioned data were gap filled  
 154 using the online tool REdyProc. Radiation was measured with a 4-component radiometer (CNR1, Kipp &  
 155 Zonen) mounted at 25.5 m. Temperature and relative humidity profiles were measured with three  
 156 mechanically aspirated, slow-response temperature-humidity sensors (model HMP35-D, Vaisala) installed  
 157 at 2, 8, and 21.5 m AGL. Further details about the US-NR1 site instrumentation and data processing can  
 158 be found elsewhere (11, 12). All flux data were from the 2016 growing season and corresponded to the  
 159 same DOY filters as the thermal data.

160 **Pinyon Flat (AMERIFLUX site US-SCw)**

161 Further information about data processing can be found at: <https://ameriflux.lbl.gov/sites/siteinfo/US-SCw>.

162 **Harvard Forest (AMERIFLUX site US-Ha-1)**

163 EC flux data were collected at the environmental measurement site tower located 2 km to the east of the  
 164 thermal camera in a forest stand of similar composition. For data processing and instrumentation details,  
 165 see (13). GPP was calculated as the residual of NEE and Re. Partitioned data were gap filled using the  
 166 online tool REdyProc. All flux data were from the 2015 growing season and corresponded to the same  
 167 DOY filters as the thermal data.

168 **Barro Colorado Island (AMERIFLUX site PA-Bar)**

169 The tower used for these measurements is 41 m above ground, on a plateau on BCI. The  
 170 EC system includes a 3-D sonic anemometer (CSAT3, Campbell Scientific Inc.) and an open-path  
 171 infrared gas analyzer (LI7500, LI-COR Inc.). High-frequency (10Hz) EC data were processed with a  
 172 custom program using a standard routine described in (14). GPP was derived from daytime values of  
 173 NEE by adding the corresponding mean daily Re obtained as the intercept of the light-response curve  
 174 (15). The light curve was fitted on a 15-day moving window using a rectangular hyperbolic function using  
 175 data after excluding friction velocities < 0.4 m s<sup>-1</sup>. Shortwave and longwave radiations were measured  
 176 using a 4-component radiometer (CNR1, Kipp & Zonen). Air temperature and relative humidity were  
 177 measured by a HC2S3 probe (Campbell Scientific Inc.) enclosed in a radiation shield. All flux data were  
 178 from the 2015 growing season and corresponded to the same DOY filters as the thermal data.

180 **Calculation of  $T_{aero}$  and  $T_{LW}$**

181  $T_{aero}$  and  $T_{LW}$  were calculated using the R package, bigleaf (16).  $T_{LW}$  was estimated using a surface  
 182 emissivity of 0.98.  $T_{aero}$  was calculated from measured sensible heat fluxes and the aerodynamic  
 183 conductance for heat transfer based on canopy structural values from Tables S1 and S2. We used the  
 184 Businger stability correction and the Su et al. formulation for boundary layer resistance in this calculation.  
 185 However, we recognize the challenges of estimating  $T_{aero}$  from sensible heat fluxes over forests with  
 186 variable roughness lengths for heat (17).

188 **Leaf Energy Balance Modeling**

189 Leaf energy balance theory has long provided a theoretical and conceptual framework for understanding  
 190 the factors that regulate  $T_{leaf}$  and its interactions with ambient microclimate and radiative forcing (18). A  
 191 leaf reflects, absorbs, and transmits shortwave (SW) radiation, and also absorbs and emits longwave  
 192 (LW) radiation. Thus, the net radiation budget for a single leaf is a function of absorbed solar shortwave  
 193 radiation ( $SW$ , in W m<sup>-2</sup>) and the net of absorbed and emitted longwave radiation ( $LW$ , in W m<sup>-2</sup>) (19–21).  
 194 For temperature modeling, it is preferable to use the isothermal net radiation ( $R_{niso}$ , in W m<sup>-2</sup>), which is  
 195 independent of  $T_{leaf}$  and describes the net radiation of a surface at air temperature (21), and thus can be  
 196 larger or smaller than  $R_{net}$ . For our canopy-scale leaf modeling we used site-level measured radiation  
 197 fluxes to calculate  $R_{niso}$  as follows (where  $SW_{net}$  is the net of downwelling and upwelling SW radiation):

$$R_{niso} = \alpha SW_{net} + \alpha_{IR} LW_{down} - \alpha_{IR} \sigma T_{air}^4 \quad 1$$

201 In this equation,  $\alpha$  represents leaf absorptance of SW radiation (assumed value of 0.5),  $\alpha_{IR}$  is the  
 202 longwave absorptance/emissivity of a leaf (assumed value of 0.98),  $\sigma$  is the Stefan-Boltzmann constant  
 203 ( $5.67 \times 10^{-8} \text{ W m}^{-2} \text{ K}^{-4}$ ), and  $T_{air}$  is in K. Assuming energy balance closure and negligible heat storage and  
 204 metabolic energy production, the temperature of a single leaf at steady state can be predicted by this  
 205 equation (19, 22, 23):  
 206

$$207 \quad T_{leaf} = T_{air} + \Delta T = T_{air} + Y \frac{R_{niso} - LE}{C_p M_{air} g_{bH}} \quad 2$$

208  
 209  $LE$  is the leaf latent heat flux ( $\text{W m}^{-2}$ ),  $M_{air}$  is the molecular mass of air ( $0.029 \text{ kg mol}^{-1}$ ),  $C_p$  is the specific  
 210 heat capacity of air ( $1010 \text{ J kg}^{-1} \text{ }^\circ\text{C}^{-1}$ ), and  $g_{bH}$  is the 2-sided leaf boundary layer conductance to heat ( $\text{mol}$   
 211  $\text{m}^{-2} \text{ s}^{-1}$ ). The  $Y$  term captures the ratio of  $g_{bH}$  to the sum of  $g_{bH}$  and the conductance to radiative heat  
 212 transfer,  $g_R$  ( $\text{mol m}^{-2} \text{ s}^{-1}$ ), following (23). In short,  $T_{leaf}$  departs from  $T_{air}$  as a function of leaf radiation  
 213 balance and sensible and latent heat energy exchanges. This equation shows that sufficiently large  $LE$   
 214 can exceed  $R_{niso}$  and thus reduce  $T_{leaf}$  below  $T_{air}$  (24). Because available  $R_{net}$  is partitioned into  $LE$  and  
 215 leaf sensible heat flux ( $H$ ), such a condition also implies that  $H$  would be negative, an underappreciated  
 216 outcome of leaf homeothermy that we evaluate using site-level EC heat flux data.  
 217

218 There are multiple ways to calculate leaf transpiration ( $LE$ ). Most approaches default to either a flux  
 219 determined by stomatal conductance and the vapor pressure driving gradient ( $VPD$ ), or a flux determined  
 220 by the net absorbed radiation available for driving evaporation (22, 25). In understanding the conditions  
 221 that force leaves to be cooler or warmer than surrounding air as a function of different transpiration  
 222 models, the concept of leaf-to-air coupling is useful. This is captured by the decoupling coefficient ( $\Omega$ ),  
 223 which is defined mathematically as (22, 26):  
 224

$$225 \quad \Omega = \frac{\varepsilon + 2 + \frac{g_R}{g_{bH}}}{\varepsilon + \frac{g_R + g_{bH} + \frac{g_R}{g_s}}{g_{bH}}} \quad 3$$

226  
 227 where  $\varepsilon$  is the ratio of  $s/\gamma$  (the ratio of the slope of saturated vapor pressure versus temperature curve to  
 228 the psychrometric constant, both of which are temperature dependent with units of  $\text{Pa K}^{-1}$ ). The leaf  
 229 stomatal conductance to water vapor is  $g_s$  (described below), while  $g_{bH}$  ( $\text{mol m}^{-2} \text{ s}^{-1}$ ) is calculated  
 230 separately for needleleaf (NL) and broadleaf (BL) plants following (27); see also (19)) for turbulent  
 231 conditions and ignoring free convection as:  
 232

$$233 \quad g_{bH-NL} = 0.006 \rho_{mol} \frac{u^{0.6}}{d^{0.4}} \quad 4a$$

$$235 \quad g_{bH-BL} = 0.0105 \rho_{mol} \frac{u^{0.5}}{d^{0.5}} \quad 4b$$

236  
 237 where  $d$  is the leaf characteristic dimension (m) taken as leaf width,  $u$  is the measured horizontal  
 238 windspeed ( $\text{m s}^{-1}$ ), and  $\rho_{mol}$  ( $\text{mol m}^{-3}$ ) is the molar density of air to convert conductance from  $\text{m s}^{-1}$  to  $\text{mol}$   
 239  $\text{m}^{-2} \text{ s}^{-1}$ . The resulting value of  $g_{bH}$  for each leaf type is multiplied by 2 to capture both sides of a leaf (20,  
 240 28). For the semi-arid pine site (Metolius, USA), a characteristic leaf dimension of 0.01 m was assumed  
 241 for a bundle of needles, while for the tropical forest site (BCI, Panama) a value of 0.1 m was used.  $P$  is  
 242 atmospheric pressure (Pa),  $T_{airK}$  is air temperature in Kelvin, and  $R$  is the ideal gas constant ( $8.3144 \text{ J}$   
 243  $\text{mol}^{-1} \text{ K}^{-1}$ ).  $g_R$ , multiplied by 2 for both leaf sides, is calculated as:  
 244

$$245 \quad g_R = 2 \rho_{mol} \frac{4 \alpha_{IR} \sigma T_{airK}^3}{\rho C_p} \quad 5$$

246  
 247  $\Omega$  is a decoupling coefficient, as a value of 1 describes a leaf that is perfectly decoupled to the  
 248 surrounding air and leads to the radiation-limited, equilibrium transpiration rate ( $\text{W m}^{-2}$ ) as (22, 26):  
 249

$$250 \quad LE_{eq} = \frac{\varepsilon R_{niso}}{\varepsilon + 1 + \frac{g_R}{g_{bH}}} \quad 6a$$

251  
 252 The equilibrium transpiration rate varies principally with  $T_{air}$  and  $R_{niso}$ . The term multiplying  $R_{niso}$ , ( $\varepsilon/(\varepsilon + 1 +$   
 253  $g_R/g_{bH})$ ), represents the fraction of absorbed radiation that is converted to latent heat (25, 29).  $\varepsilon$  is linearly  
 254 and positively related to  $VPD$  and thus implicitly includes a term that affects stomatal conductance as in  
 255 the fully coupled relationship in equation (6b). The decoupled, equilibrium transpiration is very similar to  
 256 the Priestley-Taylor formulation, which also includes an empirical modifier for modeling evaporation fluxes  
 257 across larger spatial scales.

258  
 259 By contrast, an  $\Omega$  value of 0 describes a leaf that is perfectly coupled to the surrounding air (i.e., very high  
 260 boundary layer conductances), leading to a stomatally 'imposed' transpiration rate:

$$261 \quad LE_{imp} = g_{tot} \lambda \frac{(e_{sat} - e_a)}{P} \quad 6b$$

262  
 263 where  $g_{tot}$  is the total water vapor conductance of the leaf ( $\text{mol m}^{-2} \text{s}^{-1}$ ) and is calculated as the serial sum  
 264 of  $g_s$  and  $g_{bv}$ .  $g_{bv}$  is the leaf boundary layer conductance to vapor (each vapor phase conductance is one-  
 265 sided for hypostomatous leaves as assumed here).  $g_{bv}$  is taken to be 1.08 times the value of the one-  
 266 sided  $g_{bH}$  (21, 23).  $\lambda$  is the latent heat of vaporization ( $44.2 \text{ kJ mol}^{-1}$  at  $20^\circ\text{C}$ ),  $e_{sat} - e_a$  is the vapor  
 267 pressure deficit of the atmosphere (denoted  $D$ , Pa), and  $P_a$  is atmospheric pressure (Pa).

268  
 269 Leaf latent heat fluxes ( $LE$ ) can then be modeled as the weighted sum of  $LE_{eq}$  and  $LE_{imp}$  as determined by  
 270  $\Omega$  (21, 22):

$$271 \quad LE = \Omega LE_{eq} + (1 - \Omega) LE_{imp} \quad 7$$

272  
 273 Substituting equation (7) into equation (2) yields the following relationship:

$$274 \quad T_{leaf} = T_{air} + Y \frac{R_{niso} - (\Omega LE_{eq} + (1 - \Omega) LE_{imp})}{c_p M_{air} g_{bH}} \quad 8$$

275  
 276 In the decoupled, equilibrium extreme (i.e.,  $\Omega = 1$ ), equation (8) becomes

$$277 \quad T_{leaf\_eq} = T_{air} + Y \frac{R_{niso}}{c_p M_{air} g_{bH}(\varepsilon + 1) + g_R} \quad 9$$

278  
 279 In this scenario, as long as  $R_{niso}$  is positive, the numerator will be positive and  $T_{leaf} > T_{air}$ . Importantly, the  
 280 value of  $\varepsilon$  increases exponentially with  $T_{air}$ , and in the case of constant  $g_{bH}$  the warming of  $T_{leaf}$  above  $T_{air}$   
 281 is moderated by increasing  $\varepsilon$ . For example, at  $25^\circ\text{C}$ ,  $\varepsilon = 2.8$ , and at  $35^\circ\text{C}$ ,  $\varepsilon = 4.6$ . Importantly, the only  
 282 way for  $T_{leaf}$  to be lower than  $T_{air}$  in the equilibrium case is to include a Priestley-Taylor modifier following  
 283 (30), and its importance increases with  $T_{air}$ , as that in turn enhances  $\varepsilon$ , which multiplies the modifier.

284  
 285 In the coupled, imposed extreme ( $\Omega$  approaches 0), equation (8) becomes:

$$286 \quad T_{leaf\_imp} = T_{air} + Y \frac{R_{niso} - g_{tot} \lambda \frac{D}{P}}{c_p M_{air} g_{bH}} \quad 10$$

287  
 288 In this case, a more coupled leaf's transpiration is controlled principally by  $g_{tot}$ , and  $LE$  can exceed  $R_{niso}$   
 289 and lead to  $T_{leaf} < T_{air}$ . However, as the denominator becomes large as  $g_{bH}$  and the degree of coupling  
 290 increase, damping the degree of warming or cooling so  $T_{leaf}$  approaches  $T_{air}$ . Importantly, large  $LE$   
 291 (transpiration) is much more likely to occur when  $T_{air}$  and vapor pressure gradient ( $VPD$ ) are high and  $g_{tot}$   
 292 is not depressed. However, transpiration depends critically on  $g_s$ , which is a fundamental leaf trait that  
 293 varies widely by species and in response to environmental and physiological conditions, principally  $VPD$ ,  
 294 transpiration rate, and leaf water potential (23, 31–33). Critically, in almost all cases,  $g_s$  declines sharply  
 295 with increasing  $VPD$ , often in a non-linear manner. Oren et al. (34) document a range of  $g_s$ - $VPD$   
 296 relationships, from a tropical tree species like teak (*Tecton grandis*) with very high native  $g_s$  and  $VPD$   
 297  
 298  
 299  
 300  
 301

302 sensitivity to semi-arid acacia (*Acacia* spp.) trees with low native  $g_s$  and  $VPD$  sensitivity. Fauset et al. (35)  
303 also show large differences in this relationship for co-occurring montane tropical forest species that differ  
304 in other leaf traits critical for thermoregulation. Stomatal behavior also responds to other environmental  
305 factors, including light,  $CO_2$  concentration, soil water deficit, and the hormone ABA (36).

307 For our purposes, we ignored  $CO_2$  and ABA variations. We used a coupled photosynthesis-stomatal  
308 conductance model in the R package *plantecophys* (37) to simulate  $g_s$  values to use in the above  $T_{leaf}$   
309 equations. We also tried the energy balance option in this package to simulate  $T_{leaf}$  but it systematically  
310 overestimated  $T_{leaf}$ , particularly at BCI. The coupled photosynthesis-stomatal conductance modeling used  
311 the optimality-based formulation with  $VPD$  dependence (33) to predict  $g_s$  as:

$$g_s = g_0 + 1.6\left(1 + \frac{g_1}{\sqrt{D}}\right) \frac{A}{C_a} \quad 11$$

314 where  $D$  is  $VPD$  (kPa),  $A$  is net leaf photosynthesis ( $\mu\text{mol m}^{-2} \text{s}^{-1}$ ),  $C_a$  is the atmospheric  $CO_2$   
315 concentration (ppm), and  $g_0$  and  $g_1$  are fitted parameters ( $g_0$  is typically set to 0). The slope,  $g_1$ , is  
316 proportional to the marginal water cost of carbon and the  $CO_2$  compensation point and is thus inversely  
317 related to plant water use efficiency (33, 38).

319 We used this mechanistic photosynthesis-stomatal conductance model to explore  $T_{leaf}/T_{air}$  relationships  
320 using meteorological and radiation observations from two of our sites that contrast strongly in forest type  
321 and climate: a semi-arid pine forest in the Northwestern US (Metolius, OR), and a semi-deciduous tropical  
322 forest in Panama (BCI). The meteorological and radiation data used for  $T_{leaf}$  modeling were measured at  
323 the tower top and included the following variables:  $T_{air}$ ,  $VPD$ , and downwelling  $SW$  and  $LW$  radiation. We  
324 used the *Bigleaf* R package to estimate *wind speed* at the top of the canopy using a logarithmic  
325 relationship, as this quantity is known to have large gradients between the canopy and the tower top. We  
326 chose 6-day periods at both sites when there was adequate soil volumetric water ( $> 0.2 \text{ m}^3 \text{ m}^{-3}$  at 30 cm,  
327 in the upper quartile at both sites). We used a  $g_1$  value of 2.35 for the semi-arid pine site and 3.77 (the  
328 mean of tropical rainforest  $g_1$  values) for BCI from (38). Values for the maximum RuBP carboxylation rate  
329 ( $V_{max}$ ) measured at each site or nearby were similar ( $48 \mu\text{mol m}^{-2} \text{s}^{-1}$ ) and based on (36) for Metolius and  
330 (39) for BCI.

332 At the semi-arid pine site, on an average basis, radiation fluxes and  $T_{air}$  are lower while *wind speed* and  
333  $VPD$  are generally higher, as compared to the tropical forest site. Additionally, canopy structure and leaf  
334 characteristics are quite distinct at these sites: the pine site is characterized by a generally open forest  
335 canopy with low LAI and low tree species diversity, as well as small leaf sizes (with consequent higher  
336 atmospheric coupling) and low  $g_s$ ; by contrast, the tropical forest site is characterized by a closed canopy  
337 with high tree species diversity and much larger leaf sizes (with consequently lower coupling) and high  $g_s$ .  
338 These site-specific physical and biological differences allow us to explore their influence on  $T_{leaf}$ , and  
339 specifically to better understand what controls the slope and the amount of hysteresis in the  $T_{leaf}/T_{air}$   
340 relationship. While leaf size and  $g_s$  effects partially explain the differences in  $T_{can}/T_{air}$  hysteresis between  
341 the needle-leaf and broad-leaf forests, aspects of canopy structure are also important and not captured  
342 by our modeling. All photosynthesis-conductance and  $T_{leaf}$  modeling was conducted in R (version 4.0.0 --  
343 "Arbor Day") using site-specific meteorological and radiation driving data.

344  
345  
346

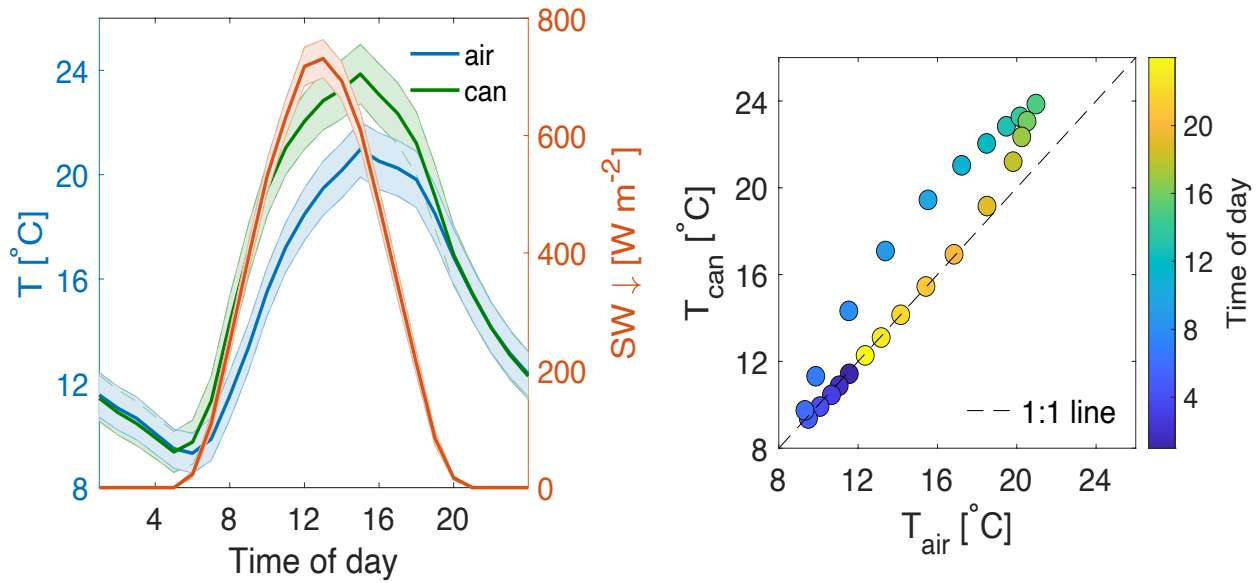

350  
351  
352 **Figure S1.** (a) Mean diel cycles of canopy  $T_{can}$ ,  $T_{air}$  (both °C), and shortwave irradiance ( $W m^{-2}$ ) for the  
353 2015 growing season (March 1-Sep 30) at Wind River with standard errors given by line shading. All  
354 times are PST. (b) Mean diel  $T_{can}$  plotted against mean diel  $T_{air}$  for the same period, color shaded by hour  
355 of day. The dashed line is the 1:1 line.  
356



357  
358  
359  
360  
361  
362  
363  
364  
365  
366  
367  
368  
369  
370  
371  
372  
373  
374  
375

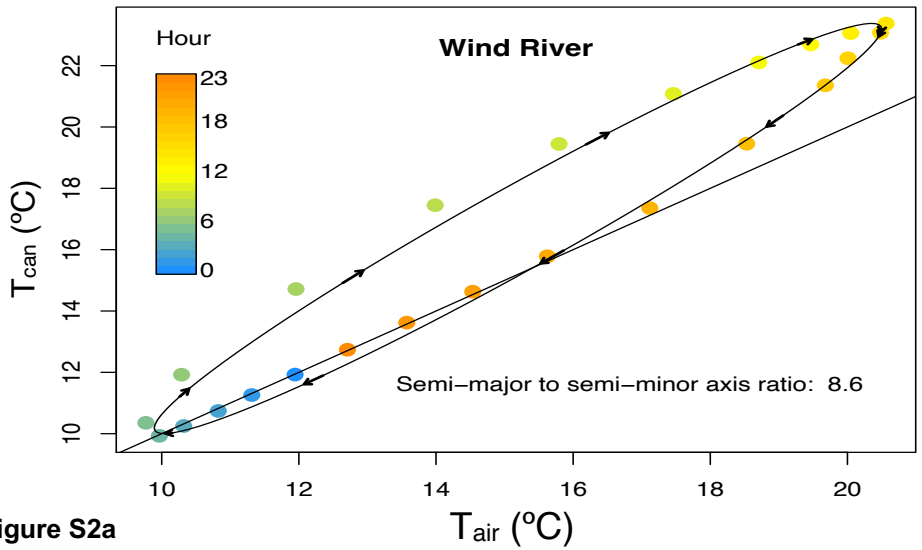

Figure S2a

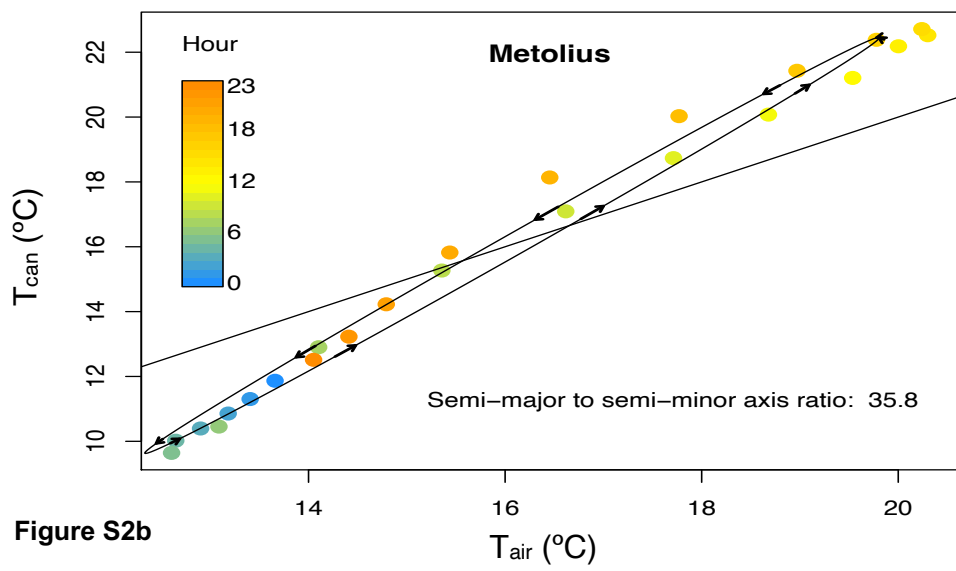

Figure S2b

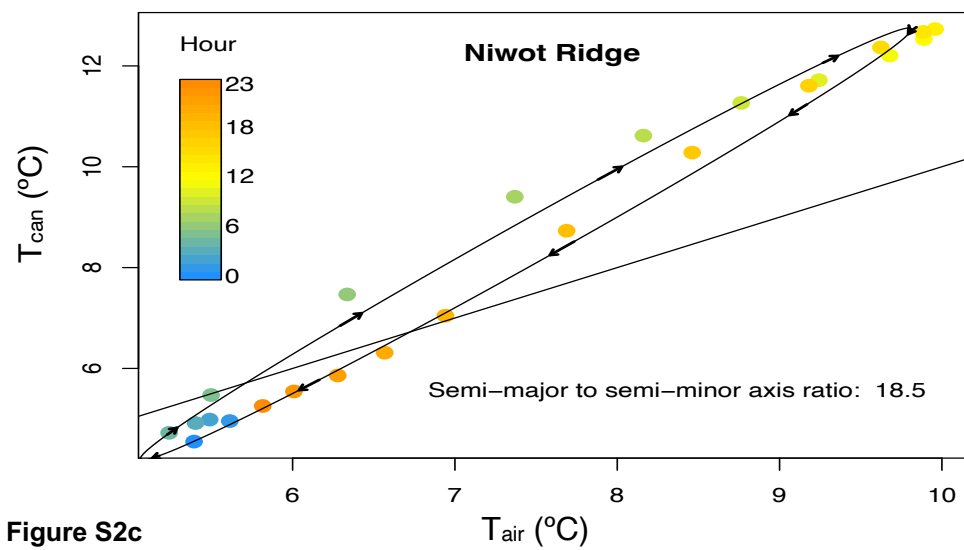

Figure S2c

380  
381

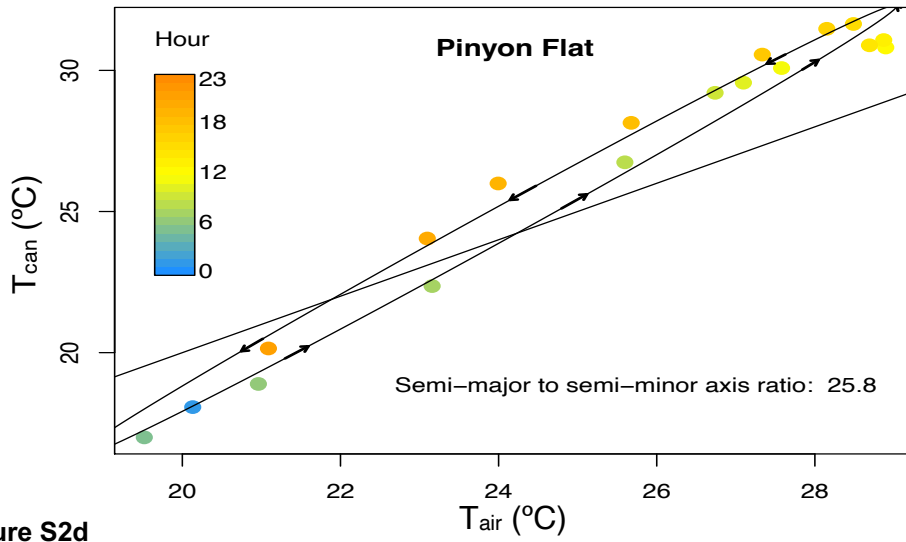

382  
383  
384 **Figure S2d**

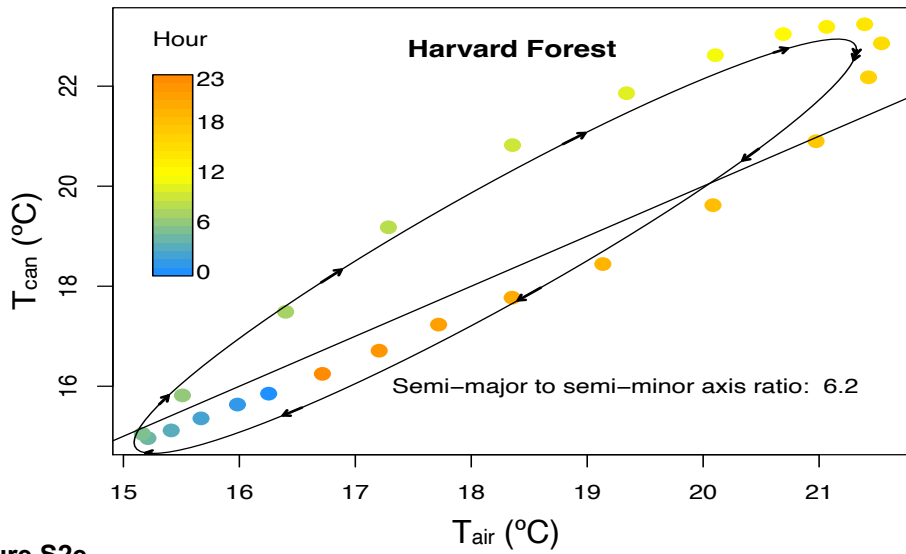

385  
386  
387  
388 **Figure S2e**

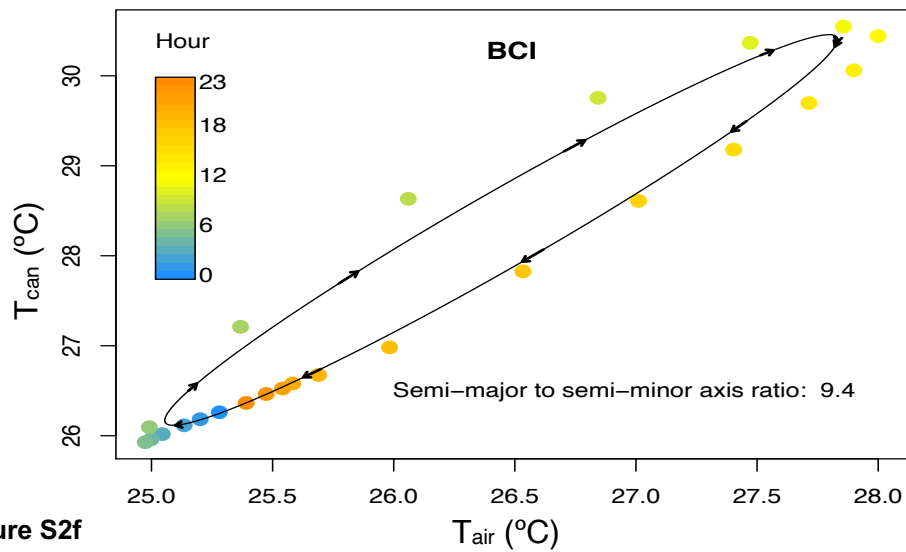

389  
390 **Figure S2f**

391 **Figure S2.** Growing season mean diel  $T_{can}$  (°C) plotted against mean diel  $T_{air}$  (°C), color shaded by hour  
392 of day at Wind River **(a)**, Metolius **(b)**, Niwot Ridge **(c)**, Pinyon Flat **(d)**, Harvard Forest **(e)**, and BCI **(f)**.  
393 Semi-major to semi-minor axis ratios are calculated with  $T_{can}$  and  $T_{air}$  normalized by their maximum  
394 respective values so that sites with different seasonal temperature ranges can be compared. Hysteresis  
395 loops and axis ratios are generated with the R package “hysteresis” following (40). The solid line is the  
396 1:1 line.

397

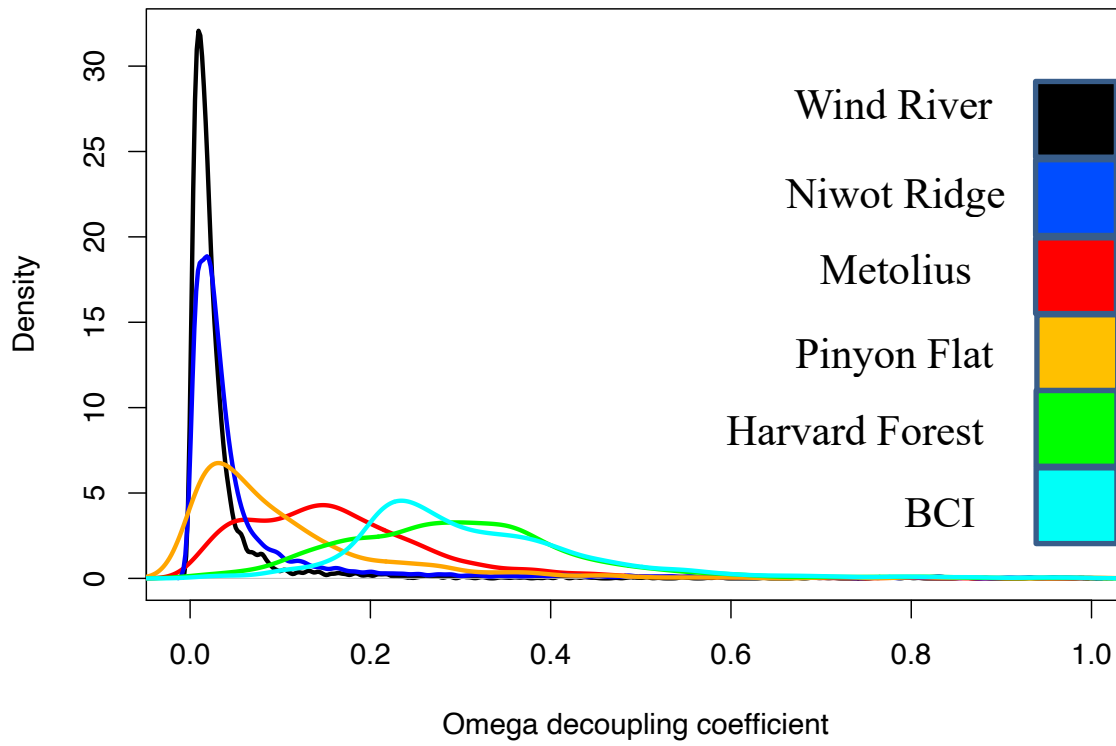

398  
399  
400  
401  
402

**Figure S3.** The canopy-scale omega decoupling coefficient for each site calculated with the R package, Bigleaf (16).

403  
404  
405  
406  
407  
408  
409  
410  
411  
412  
413  
414  
415  
416  
417  
418  
419  
420  
421  
422  
423  
424  
425  
426  
427  
428  
429  
430  
431  
432  
433  
434  
435  
436  
437  
438  
439  
440  
441  
442  
443  
444  
445

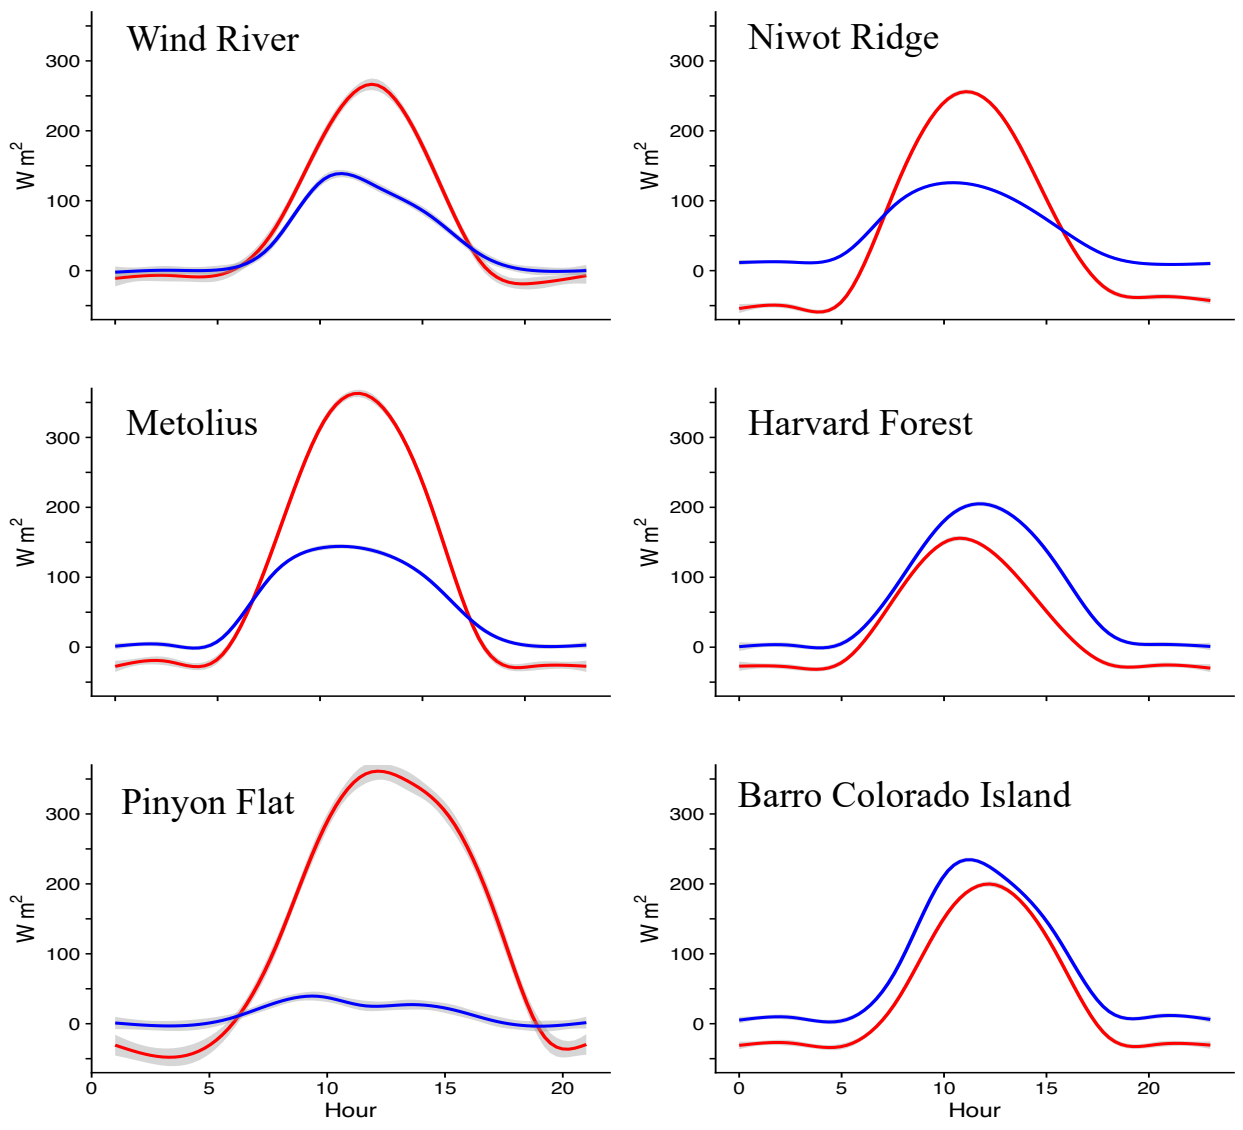

**Figure S4.** Mean growing season diurnal sensible (red line) and latent heat fluxes (both in  $W m^{-2}$ ) for each site using the same time period of data for  $T_{can}$ . Shading around each line is the 95% CI using half-hourly flux data filtered consistent in the same way as the  $T_{can}$  analyses. A smoothed line fit using a generalized additive model (41) in R version 3.6.2 (R Core Team 2019).

446

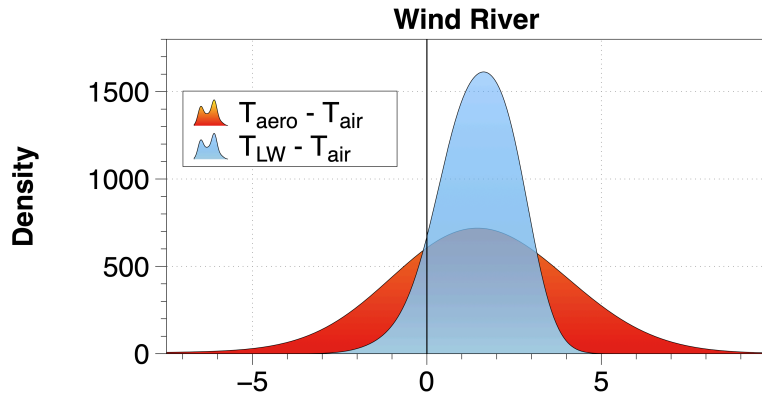

447

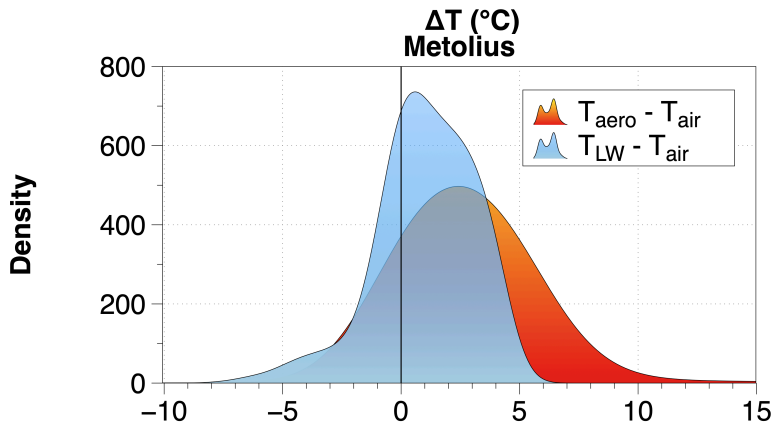

448

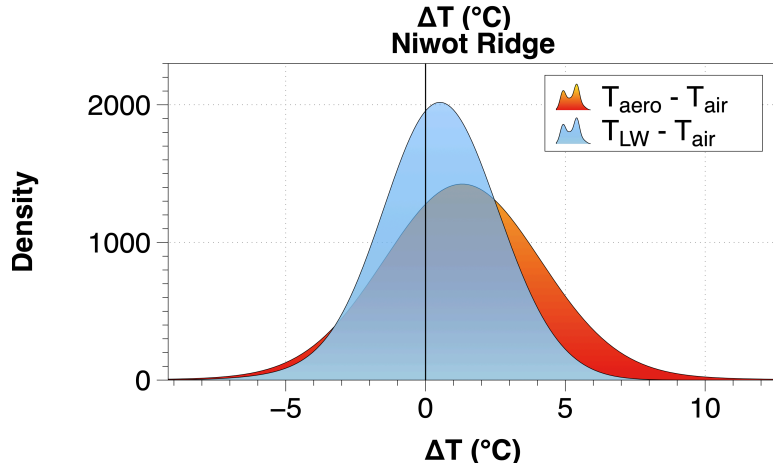

449

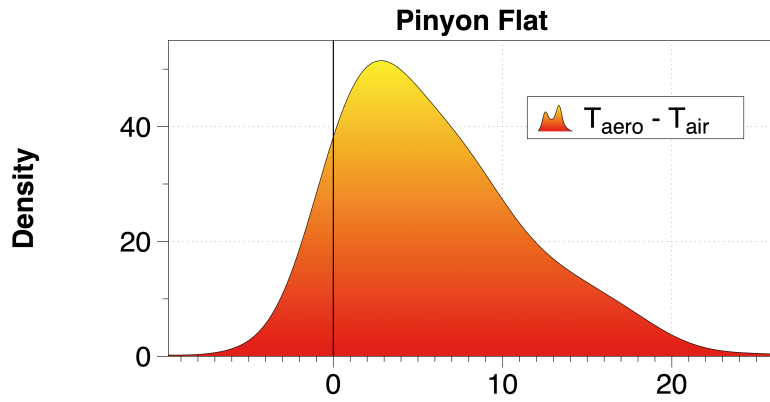

450

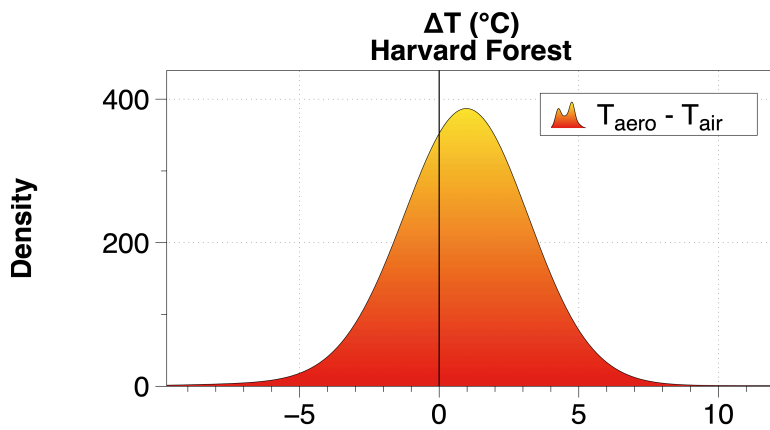

451

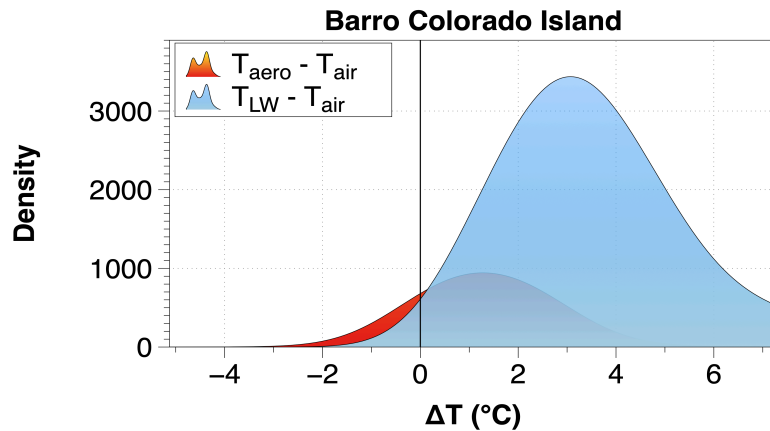

452

453

454 **Figure S5.** Probability density histograms of various daytime canopy and surface temperature metrics  
 455 minus  $T_{air}$  at all of our sites. The smoothed orange histograms refer to  $(T_{aero} - T_{air})$  at all sites, where  $T_{aero}$   
 456 is the aerodynamic temperature calculated from eddy covariance measurements of sensible heat flux,  
 457 windspeed, and friction velocity. The smoothed light blue histograms represent  $(T_{LW} - T_{air})$  at Wind River,  
 458 Metolius, and Niwot Ridge, where  $T_{LW}$  is the surface radiometric temperature calculated from available  
 459 measurements of upwelling longwave radiation measured by radiometers on the towers. Only daytime  
 460 flux, meteorological, and radiation data when downwelling shortwave radiation exceeded  $25 \text{ W m}^{-2}$  were  
 461 included in these analyses.

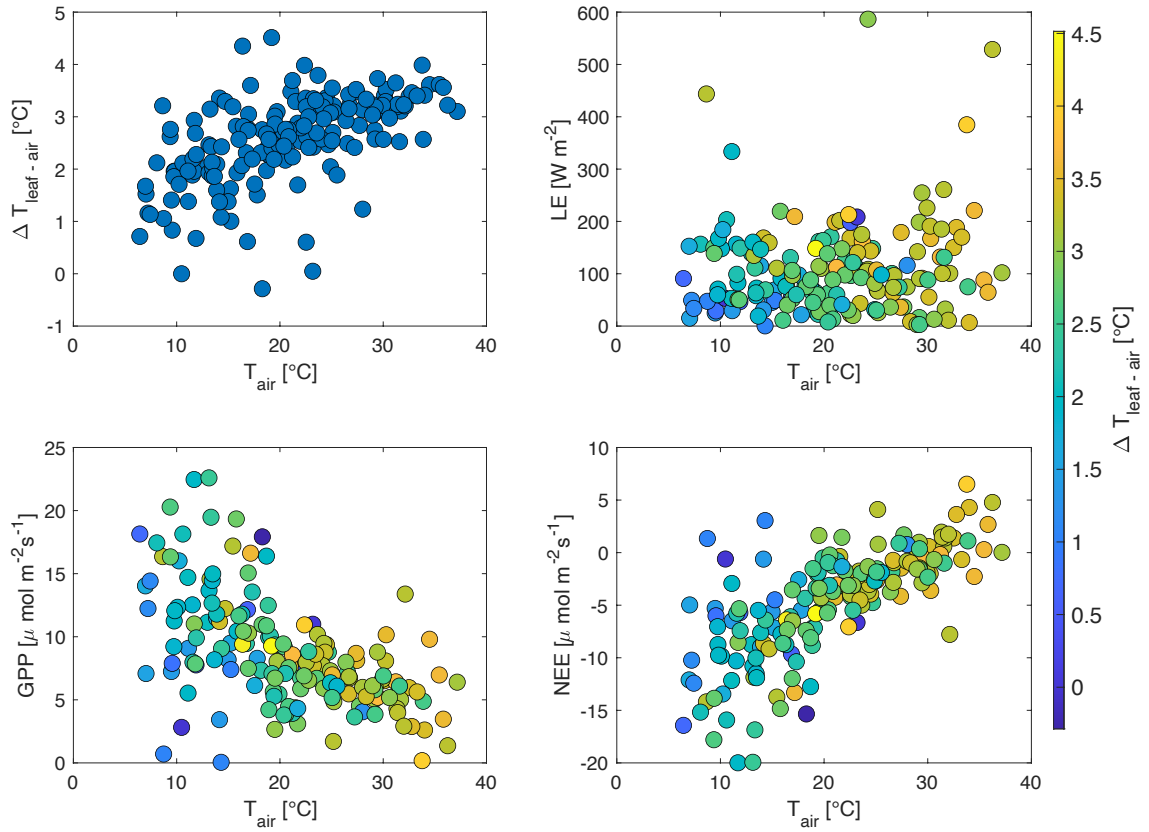

462  
 463  
 464  
 465  
 466

**Figure S6.** Relationships between daily maximum  $T_{air}$  and  $(T_{can} - T_{air})$ , latent heat ( $W\ m^{-2}$ ), and NEE and GPP ( $\mu\text{mol}\ m^{-2}\ s^{-1}$ ) during the 2015 growing season (Mar-Sep) at Wind River.



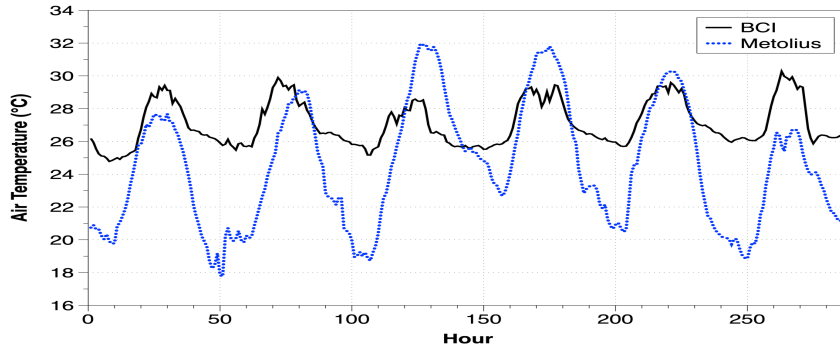

467  
468  
469

Figure S7a

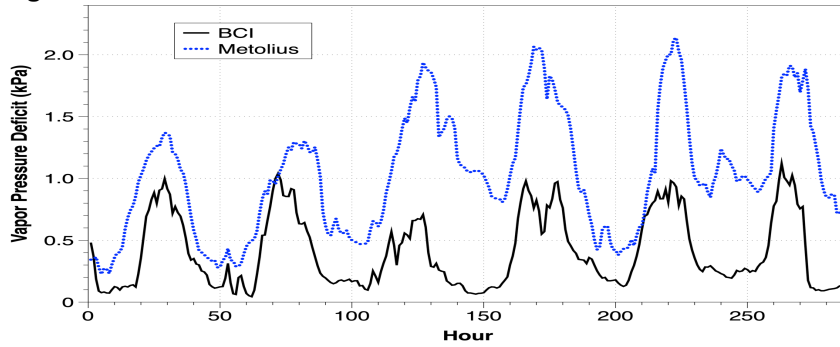

470  
471  
472

Figure S7b

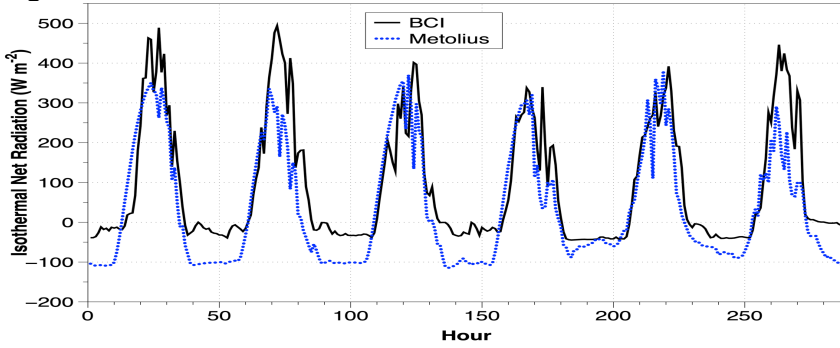

473  
474  
475  
476

Figure S7c

477 **Figure S7.** Observed meteorological and radiation data used to drive leaf temperature models at Metolius  
 478 (dashed blue line) and BCI (solid black line). **(a)** air temperature ( $^{\circ}\text{C}$ ), **(b)** atmospheric vapor pressure  
 479 deficit ( $\text{kPa}$ ), and **(c)** isothermal net radiation ( $\text{W m}^{-2}$ ).  
 480

481

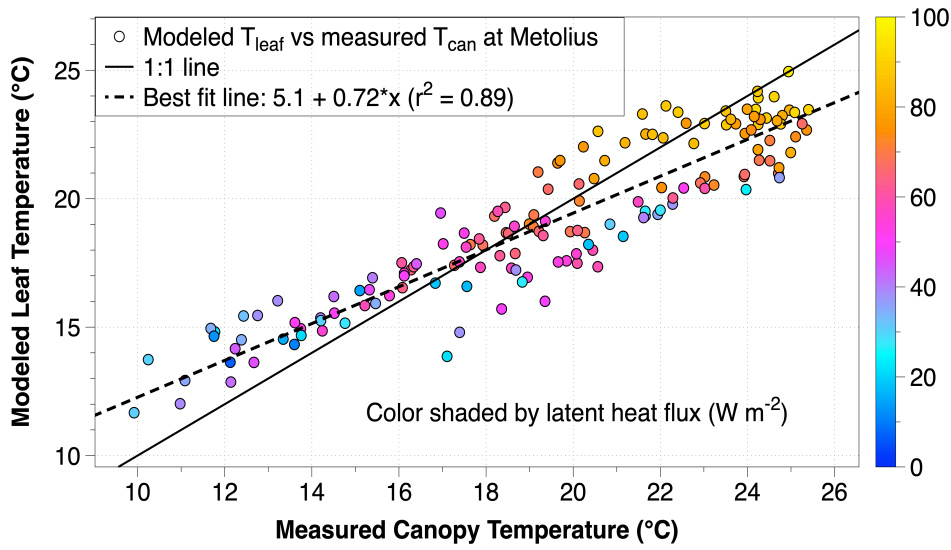

482  
483  
484

Figure S8a

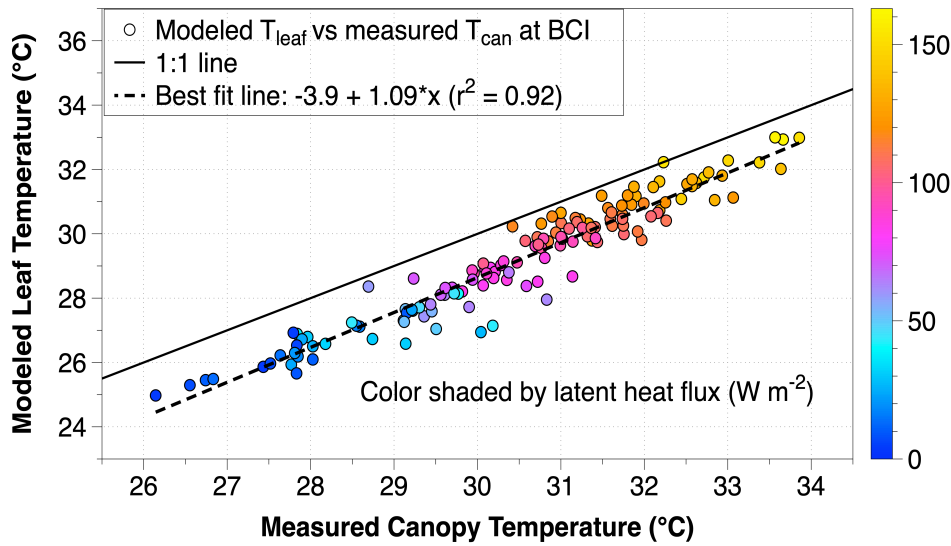

485  
486  
487  
488  
489  
490  
491  
492  
493

Figure S8b

**Figure S8.** Modeled  $T_{leaf}$  versus measured  $T_{can}$  ( $^{\circ}C$ ) at Metolius **(a)** during a rain-free period (May 25-June 1, 2015) and BCI **(b)** for a period in the wet season (June 12-18, 2015). Color shading in both figures is by transpiration ( $W m^{-2}$ ) during daytime conditions (downwelling shortwave radiation threshold of  $25 W m^{-2}$ ).

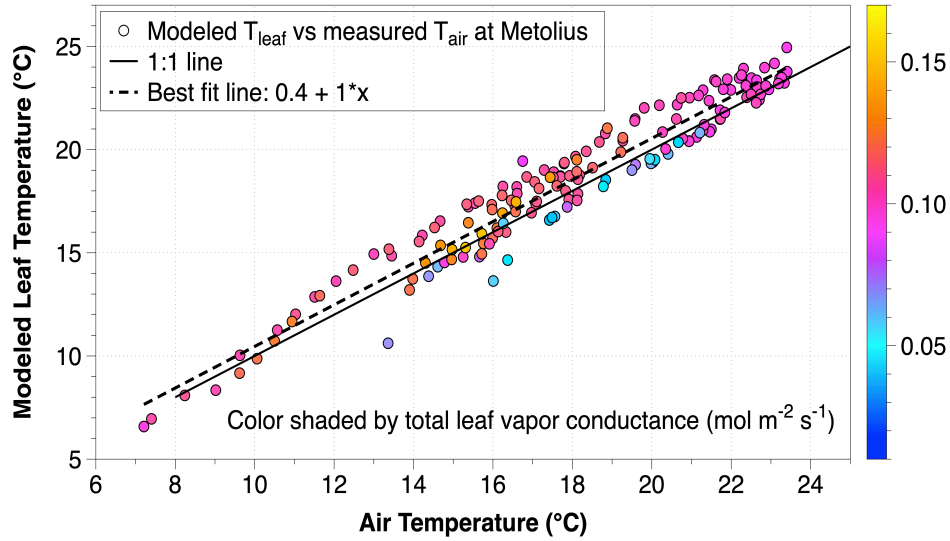

Figure S9a

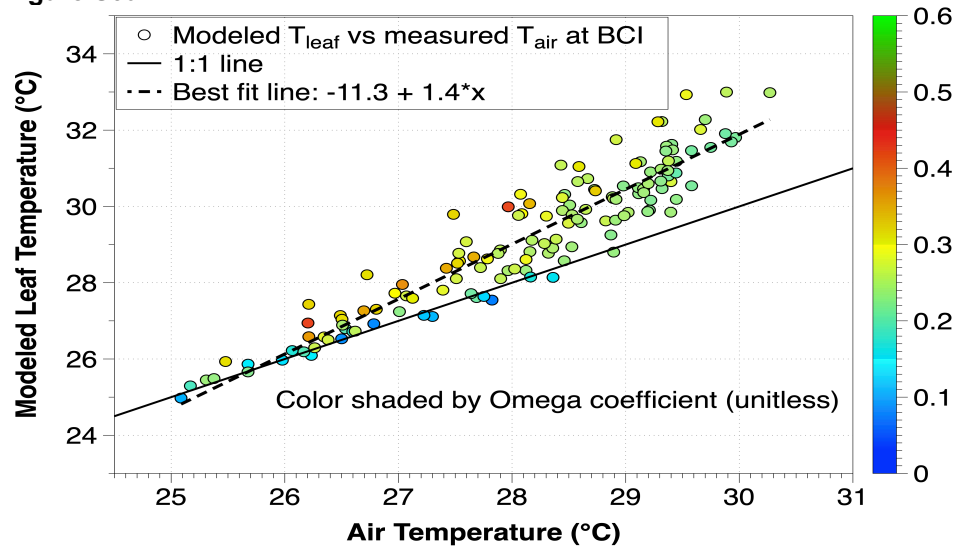

Figure S9b

**Figure S9.** Modeled  $T_{leaf}$  versus measured  $T_{air}$  ( $^{\circ}\text{C}$ ) at Metolius (**a**) during a rain-free period (May 25-June 1, 2015) with shading by total water vapor leaf conductance ( $\text{mol m}^{-2} \text{s}^{-1}$ ) and at BCI (**b**) for a period in the wet season (June 12-18, 2015) with color shading by the omega decoupling factor (unitless).

**Table S1.** Summary of forest climate and biotic characteristics. MAT and MAP indicate mean annual temperature and mean annual precipitation, respectively. LAI is leaf area index ( $m^2 m^{-2}$ ).

| Site                  | Forest ecosystem type                                                          | Climate classification  | Location                 | Elevation (m) | MAT (°C) | MAP (mm) | LAI             | Mean tree height (m) |
|-----------------------|--------------------------------------------------------------------------------|-------------------------|--------------------------|---------------|----------|----------|-----------------|----------------------|
| Metolius              | semi-arid temperate second-growth conifer forest                               | Mediterranean           | 44.4523 N<br>-121.5574 E | 1253          | 6.3      | 523      | 2.8             | 18                   |
| Wind River            | moist temperate old-growth conifer forest                                      | Mediterranean           | 45.8205 N<br>-121.9519 E | 371           | 8.8      | 2200     | 9.2             | 50-60                |
| Niwot Ridge           | subalpine evergreen needleleaf forest                                          | Subarctic               | 40.0329 N<br>-105.5464 E | 3050          | 1.5      | 800      | 3.8<br>-<br>4.2 | 12-13                |
| Pinyon Flat           | arid conifer woodland                                                          | Warm Mediterranean      | 33.6047 N<br>-116.4527 E | 1281          | 15.8     | 316      | -               |                      |
| Harvard Forest        | moist temperate forest with deciduous broadleaf and evergreen needleleaf trees | Warm Summer Continental | 42.5378 N<br>-72.1715 E  | 340           | 6.6      | 1150     | 3-4             | 18                   |
| Barro Colorado Island | tropical forest with deciduous and evergreen broadleaf trees                   | Tropical Rain Forest    | 9.154 N<br>-79.848 E     | 150           | 26.0     | 2640     | 6.0             | 25                   |

**Table S2.** Forest site descriptions

| Site name             | Forest characteristics                                                                                                                                                                                                                                                                                                                                                                                                                                                                                                                                                                                                                                                                                                                                                                                                                                                                                                                                                                                                                                                                                                                           |
|-----------------------|--------------------------------------------------------------------------------------------------------------------------------------------------------------------------------------------------------------------------------------------------------------------------------------------------------------------------------------------------------------------------------------------------------------------------------------------------------------------------------------------------------------------------------------------------------------------------------------------------------------------------------------------------------------------------------------------------------------------------------------------------------------------------------------------------------------------------------------------------------------------------------------------------------------------------------------------------------------------------------------------------------------------------------------------------------------------------------------------------------------------------------------------------|
| Metolius              | The Metolius site (hereafter, MR) is located in a mature coniferous forest in central Oregon at an elevation of 1253 m asl. The study forest is designated as a core research site in the AMERIFLUX network (site US-Me2) where microclimate and eddy covariance flux measurements are collected from a flux tower. The canopy is dominated by ponderosa pine trees ( <i>Pinus ponderosa</i> ) with a few scattered incense cedar trees ( <i>Calocedrus decurrens</i> ). Trees are evenly distributed and the mean tree density is approximately 339 trees ha <sup>-1</sup> (42). The climate is semi-arid, with warm and dry summers and cool and wet winters, with most precipitation occurring as snow or rain during the winter and spring (November through April). Additional descriptions of the study site, as well as information on site instrumentation and measurements, can be found in (7, 43)                                                                                                                                                                                                                                     |
| Wind River            | The Wind River site (hereafter, WR) is an Experimental Forest located in southwest Washington state, USA at an elevation of 371 m asl. This site has been registered as an AMERIFLUX network site (US-Wrc) since 1998 and is a NEON Core Site. The forest is 478 ha of preserved old-growth (~500 years old) evergreen needle-leaf forest, with two dominant tree species: Douglas fir ( <i>Pseudotsuga menziesii</i> ) and western hemlock ( <i>Tsuga heterophylla</i> ). The forest has a stand density of 427 trees ha <sup>-1</sup> and basal area of 82.9 m <sup>2</sup> ha <sup>-1</sup> . Douglas-fir dominates the forest in basal area (~43%) and wood volume (~50%). This results in a bimodal distribution of LAI (44), with peaks centered at 35m and 15m respectively. Details of sensor measurements are reported elsewhere (9).                                                                                                                                                                                                                                                                                                   |
| Niwot Ridge           | The Niwot Ridge Subalpine Forest site (hereafter, NW) is an AmeriFlux site (US-NR1, 1998-present) located in the Rocky Mountains of Colorado (40° 1' 58.349" N, 105° 32' 49.095" W, Elevation: ~3050m). The tower (height 26m) is surrounded by mix of evergreen needleleaf species: lodgepole pine ( <i>Pinus contorta</i> Douglas ex Loudon), Engelmann spruce ( <i>Picea engelmannii</i> Parry ex Engelm.), and subalpine fir ( <i>Abies lasiocarpa</i> (Hook.) Nutt.). Smaller patches of aspen ( <i>Populus tremuloides</i> ) and limber pine ( <i>Pinus flexilis</i> ) are also present. The tree density near the tower is ~4000 trees ha <sup>-1</sup> (Monson et al. 2010). Though the terrain within 5 km of the site can be quite steep, the tower is located in a relatively flat area with an approximate topographic slope angle of 4.3°. From November-February, the weather at the site is characterized by cold mid-continental conditions and strong downslope winds are frequent. Snow usually covers the ground from early November until late May. Further details about the US-NR1 site are documented elsewhere (11, 12). |
| Pinyon Flat Juniper   | Arid conifer woodland composed of a mix of juniper ( <i>Juniperus sp.</i> ) and pinyon pine ( <i>Pinus monophylla</i> ) trees and associated shrubs and grasses.                                                                                                                                                                                                                                                                                                                                                                                                                                                                                                                                                                                                                                                                                                                                                                                                                                                                                                                                                                                 |
| Harvard Forest        | The Harvard Forest site (HF) is a mixed temperate forest located in rural central Massachusetts, USA, about 100 km west of the city of Boston. Mixed forest stands surrounding the tower are dominated by the deciduous species red oak ( <i>Quercus rubra</i> L., ~40% of basal area) and red maple ( <i>Acer rubrum</i> L., ~20% of basal area). Evergreen white pine ( <i>Pinus strobus</i> L.) is the dominant conifer.                                                                                                                                                                                                                                                                                                                                                                                                                                                                                                                                                                                                                                                                                                                      |
| Barro Colorado Island | The Barro Colorado Island site (BCI) forest site in Panama (9°9' N, 79°50' W). The forest is semi-deciduous with high biodiversity (~300 species of trees and 162 species of lianas in 50 ha). The climate is characterized by a dry season from mid-December to mid-April, during which about 20% of canopy trees are leafless resulting in a moderate seasonal variation of LAI. Above-ground biomass 140 Mg C ha <sup>-1</sup> (45).                                                                                                                                                                                                                                                                                                                                                                                                                                                                                                                                                                                                                                                                                                          |

**SI References**

1. D. M. Aubrecht, *et al.*, Continuous, long-term, high-frequency thermal imaging of vegetation: Uncertainties and recommended best practices. *Agric. For. Meteorol.* **228–229** (2016).
2. M. G. J. Tattersall, L. True, Package 'Thermimage' (2016).

3. Y. Kim, *et al.*, Canopy skin temperature variations in relation to climate, soil temperature, and carbon flux at a ponderosa pine forest in central Oregon. *Agric. For. Meteorol.* **226–227** (2016).
4. D. R. Bowling, *et al.*, Limitations to winter and spring photosynthesis of a Rocky Mountain subalpine forest. *Agric. For. Meteorol.* **252**, 241–255 (2018).
5. S. Pau, M. Detto, Y. Kim, C. J. Still, Tropical forest temperature thresholds for gross primary productivity. *Ecosphere* **9**, 1–12 (2018).
6. C. J. Still, *et al.*, Imaging canopy temperature: shedding (thermal) light on ecosystem processes. *New Phytol.* (2021) <https://doi.org/10.1111/nph.17321>.
7. H. Kwon, B. E. Law, C. K. Thomas, B. G. Johnson, The influence of hydrological variability on inherent water use efficiency in forests of contrasting composition, age, and precipitation regimes in the Pacific Northwest. *Agric. For. Meteorol.* **249**, 488–500 (2018).
8. C. K. Thomas, *et al.*, Seasonal hydrology explains interannual and seasonal variation in carbon and water exchange in a semiarid mature ponderosa pine forest in central Oregon. *J. Geophys. Res. Biogeosciences* **114**, 1–22 (2009).
9. S. Wharton, M. Falk, K. Bible, M. Schroeder, K. T. Paw U, Old-growth CO<sub>2</sub> flux measurements reveal high sensitivity to climate anomalies across seasonal, annual and decadal time scales. *Agric. For. Meteorol.* **161**, 1–14 (2012).
10. S. P. Burns, T. W. Horst, L. Jacobsen, P. D. Blanken, R. K. Monson, Using sonic anemometer temperature to measure sensible heat flux in strong winds. *Atmos. Meas. Tech.* **5**, 2095–2111 (2012).
11. R. K. Monson, *et al.*, Carbon sequestration in a high-elevation, subalpine forest. *Glob. Chang. Biol.* **8**, 459–478 (2002).
12. S. P. Burns, P. D. Blanken, A. A. Turnipseed, J. Hu, R. K. Monson, The influence of warm-season precipitation on the diel cycle of the surface energy balance and carbon dioxide at a Colorado subalpine forest site. *Biogeosciences* **12**, 7349–7377 (2015).
13. S. Urbanski, *et al.*, Factors controlling CO<sub>2</sub> exchange on timescales from hourly to decadal at Harvard Forest. *J. Geophys. Res. Biogeosciences* **112**, 1–25 (2007).
14. M. Detto, D. Baldocchi, G. G. Katul, Scaling Properties of Biologically Active Scalar Concentration Fluctuations in the Atmospheric Surface Layer over a Managed Peatland. *Boundary-Layer Meteorol.* **136**, 407–430 (2010).
15. G. Lasslop, *et al.*, Separation of net ecosystem exchange into assimilation and respiration using a light response curve approach: Critical issues and global evaluation. *Glob. Chang. Biol.* **16**, 187–208 (2010).
16. J. Knauer, T. S. El-Madany, S. Zaehle, M. Migliavacca, Bigleaf—An R package for the calculation of physical and physiological ecosystem properties from eddy covariance data. *PLoS One* **13**, 1–26 (2018).
17. A. M. Young, *et al.*, Seasonality in aerodynamic resistance across a range of North American ecosystems. *Agric. For. Meteorol.* **310**, 108613 (2021).
18. D. M. Gates, Energy Exchange and Ecology. *Bioscience* **18**, 90–95 (1968).
19. G. S. Campbell, J. M. Norman, *An Introduction to Environmental Biophysics*, Second (Springer-Verlag, 1998).
20. J. Monteith, M. Unsworth, *Principles of environmental physics: plants, animals, and the atmosphere*. (Academic Press, 2013).
21. H. G. Jones, *Plants and microclimate: a quantitative approach to environmental plant physiology* (Cambridge University Press, 2014).
22. P. G. Jarvis, K. G. Mcnaughton, Stomatal Control of Transpiration: Scaling Up from Leaf to Region. *Adv. Ecol. Res.* **15**, 1–49 (1986).
23. R. LEUNING, F. M. KELLIHER, D. G. G. DE PURY, E. -D SCHULZE, Leaf nitrogen, photosynthesis, conductance and transpiration: scaling from leaves to canopies. *Plant. Cell Environ.* **18**, 1183–1200 (1995).
24. N. Dong, I. C. Prentice, S. P. Harrison, Q. H. Song, Y. P. Zhang, Biophysical homeostasis of leaf temperature: A neglected process for vegetation and land-surface modelling. *Glob. Ecol. Biogeogr.* **26**, 998–1007 (2017).
25. R. Pieruschka, G. Huber, J. A. Berry, Control of transpiration by radiation. *Proc. Natl. Acad. Sci. U. S. A.* **107**, 13372–13377 (2010).

26. P. Martin, The significance of radiative coupling between vegetation and the atmosphere. *Agric. For. Meteorol.* **49**, 45–53 (1989).
27. S. T. Michaletz, *et al.*, The energetic and carbon economic origins of leaf thermoregulation. *Nat. Plants* **2** (2016).
28. G. B. Bonan, *Ecological climatology: Concepts and applications*, Second Edi (Cambridge University Press, 2016).
29. F. M. Kelliher, R. Leuning, M. R. Raupach, E. D. Schulze, Maximum conductances for evaporation from global vegetation types. *Agric. For. Meteorol.* **73**, 1–16 (1995).
30. I. J. Wright, *et al.*, Global climatic drivers of leaf size. *Science (80-. )*. **357**, 917–921 (2017).
31. F. C. Meinzer, *et al.*, Atmospheric and hydraulic limitations on transpiration in Brazilian cerrado woody species. *Funct. Ecol.* **13**, 273–282 (1999).
32. T. N. Buckley, The control of stomata by water balance. *New Phytol.* **168**, 275–292 (2005).
33. B. E. Medlyn, *et al.*, Reconciling the optimal and empirical approaches to modelling stomatal conductance. *Glob. Chang. Biol.* **17**, 2134–2144 (2011).
34. R. Oren, *et al.*, Survey and synthesis of intra- and interspecific variation in stomatal sensitivity to vapour pressure deficit. *Plant, Cell Environ.* **22**, 1515–1526 (1999).
35. S. Fauset, *et al.*, Differences in leaf thermoregulation and water use strategies between three co-occurring Atlantic forest tree species. *Plant Cell Environ.* **41**, 1618–1631 (2018).
36. P. J. Franks, J. A. Berry, D. L. Lombardozzi, G. B. Bonan, Stomatal function across temporal and spatial scales: Deep-time trends, land-atmosphere coupling and global models. *Plant Physiol.* **174**, 583–602 (2017).
37. R. A. Duursma, Plantecophys - An R package for analysing and modelling leaf gas exchange data. *PLoS One* **10**, 1–13 (2015).
38. Y. S. Lin, *et al.*, Optimal stomatal behaviour around the world. *Nat. Clim. Chang.* **5**, 459–464 (2015).
39. J. Wu, *et al.*, The response of stomatal conductance to seasonal drought in tropical forests. *Glob. Chang. Biol.* **26**, 823–839 (2020).
40. F. Yang, A. M. Parkhurst, Efficient Estimation of Elliptical Hysteresis with Application to the Characterization of Heat Stress. *J. Agric. Biol. Environ. Stat.* **20**, 371–388 (2015).
41. H. Wickham, ggplot2.
42. J. Irvine, B. E. Law, J. G. Martin, D. Vickers, Interannual variation in soil CO<sub>2</sub> efflux and the response of root respiration to climate and canopy gas exchange in mature ponderosa pine. *Glob. Chang. Biol.* **14**, 2848–2859 (2008).
43. B. E. Law, *et al.*, Carbon dioxide and water vapor exchange by young and old ponderosa pine ecosystems during a dry summer. *Tree Physiol.* **21**, 299–308 (2001).
44. G. G. Parker, *et al.*, Three-dimensional structure of an old-growth *Pseudotsuga-tsuga* canopy and its implications for radiation balance, microclimate, and gas exchange. *Ecosystems* **7**, 440–453 (2004).
45. M. Detto, S. J. Wright, O. Calderón, H. C. Muller-Landau, Resource acquisition and reproductive strategies of tropical forest in response to the El Niño-Southern Oscillation. *Nat. Commun.* **9**, 1–8 (2018).
